# Supplementary material for: Estimates of the Effective Population Size and Genetic Structure of the Critically Endangered Ship Sturgeon (Acipenser nudiventris) in the Chinese Section of the Ili River
Source: MDPI journal article supplement (doi:10.3390/fishes8070354), 2023-07-07
Supplement: s1 [file s1]

**Table S2. Genome mapping of reads from ship sturgeon genome to genome sequences of *A. ruthenus*.**

| Sample  | All reads | Mapping reads | Mapping rate |
|---------|-----------|---------------|--------------|
| SS01    | 320084008 | 327574843     | 99.48%       |
| SS02    | 320164352 | 318501727     | 99.48%       |
| SS03    | 320264610 | 318593489     | 99.48%       |
| SS04    | 320147024 | 318502897     | 99.49%       |
| SS05    | 320015306 | 318367691     | 99.49%       |
| SS06    | 320315426 | 318716147     | 99.50%       |
| SS07    | 320211422 | 318658348     | 99.51%       |
| SS08    | 320210142 | 318621428     | 99.50%       |
| SS09    | 320088890 | 318517023     | 99.51%       |
| SS10    | 257939920 | 256566428     | 99.47%       |
| SS11    | 318228722 | 316579982     | 99.48%       |
| SS12    | 320075688 | 327493162     | 99.51%       |
| SS13    | 290731672 | 289284156     | 99.50%       |
| SS14    | 320123410 | 318675453     | 99.55%       |
| SS15    | 303331526 | 301846221     | 99.51%       |
| SS16    | 278818214 | 277409868     | 99.49%       |
| Average | 310671896 | 310244304     | 99.50%       |
