# Supplementary material for: Estimates of the Effective Population Size and Genetic Structure of the Critically Endangered Ship Sturgeon (Acipenser nudiventris) in the Chinese Section of the Ili River
Source: MDPI journal article supplement (doi:10.3390/fishes8070354), 2023-07-07
Supplement: s1 [file s1]

**Table S1. Estimated genomic coancestry coefficients between each pair of 16 re-sequenced individuals.**

| <b>a</b> | <b>b</b> | <b>coancestry coefficient</b> |
|----------|----------|-------------------------------|
| 6        | 15       | 0.226267                      |
| 8        | 12       | 0.225324                      |
| 15       | 16       | 0.224563                      |
| 13       | 14       | 0.223815                      |
| 6        | 16       | 0.220735                      |
| 6        | 14       | 0.218888                      |
| 2        | 6        | 0.202628                      |
| 1        | 6        | 0.19381                       |
| 10       | 13       | 0.185391                      |
| 5        | 6        | 0.175605                      |
| 14       | 16       | 0.169708                      |
| 3        | 8        | 0.16897                       |
| 6        | 13       | 0.167045                      |
| 14       | 15       | 0.165089                      |
| 4        | 16       | 0.163221                      |
| 4        | 15       | 0.162794                      |
| 3        | 12       | 0.162515                      |
| 10       | 14       | 0.158026                      |
| 3        | 9        | 0.150545                      |
| 7        | 9        | 0.14991                       |
| 2        | 5        | 0.144262                      |
| 1        | 2        | 0.143957                      |
| 5        | 15       | 0.143322                      |
| 2        | 15       | 0.142573                      |
| 5        | 16       | 0.141241                      |
| 1        | 16       | 0.139431                      |
| 1        | 15       | 0.1387                        |
| 2        | 14       | 0.136212                      |
| 1        | 14       | 0.134198                      |
| 5        | 14       | 0.1335                        |
| 2        | 16       | 0.132655                      |
| 1        | 5        | 0.131528                      |
| 13       | 15       | 0.131388                      |
| 13       | 16       | 0.131339                      |
| 7        | 8        | 0.128856                      |
| 8        | 9        | 0.126997                      |
| 1        | 13       | 0.12642                       |
| 7        | 12       | 0.125136                      |

|    |    |          |
|----|----|----------|
| 9  | 10 | 0.123637 |
| 3  | 7  | 0.121517 |
| 2  | 13 | 0.119479 |
| 4  | 7  | 0.119257 |
| 3  | 4  | 0.115711 |
| 5  | 13 | 0.113609 |
| 4  | 12 | 0.113212 |
| 4  | 8  | 0.111798 |
| 9  | 12 | 0.11046  |
| 9  | 11 | 0.110271 |
| 7  | 10 | 0.110001 |
| 4  | 9  | 0.109663 |
| 3  | 11 | 0.105046 |
| 10 | 11 | 0.104295 |
| 7  | 11 | 0.100925 |
| 11 | 12 | 0.099647 |
| 4  | 11 | 0.098098 |
| 8  | 11 | 0.097093 |
| 5  | 11 | 0.096186 |
| 4  | 10 | 0.095933 |
| 10 | 12 | 0.093688 |
| 3  | 10 | 0.093285 |
| 1  | 11 | 0.092295 |
| 8  | 10 | 0.090674 |
| 2  | 11 | 0.090052 |
| 9  | 13 | 0.089861 |
| 11 | 13 | 0.086387 |
| 9  | 14 | 0.08595  |
| 5  | 7  | 0.085432 |
| 4  | 5  | 0.08514  |
| 7  | 14 | 0.084605 |
| 11 | 15 | 0.083621 |
| 7  | 13 | 0.081949 |
| 3  | 16 | 0.081142 |
| 5  | 12 | 0.080926 |
| 3  | 5  | 0.080853 |
| 7  | 16 | 0.079863 |
| 11 | 16 | 0.079622 |
| 5  | 8  | 0.079451 |
| 1  | 10 | 0.079324 |
| 11 | 14 | 0.078653 |
| 7  | 15 | 0.078631 |
| 2  | 3  | 0.075405 |

|    |    |          |
|----|----|----------|
| 8  | 15 | 0.07509  |
| 1  | 7  | 0.0746   |
| 5  | 10 | 0.074529 |
| 6  | 11 | 0.074455 |
| 1  | 9  | 0.074266 |
| 12 | 15 | 0.074221 |
| 9  | 16 | 0.073967 |
| 5  | 9  | 0.073549 |
| 2  | 12 | 0.072565 |
| 2  | 7  | 0.072456 |
| 8  | 16 | 0.072448 |
| 3  | 15 | 0.071975 |
| 1  | 3  | 0.071826 |
| 12 | 16 | 0.071425 |
| 2  | 10 | 0.070041 |
| 10 | 16 | 0.070036 |
| 3  | 13 | 0.06989  |
| 8  | 14 | 0.069568 |
| 1  | 12 | 0.068893 |
| 4  | 13 | 0.068642 |
| 2  | 9  | 0.068447 |
| 2  | 8  | 0.068339 |
| 9  | 15 | 0.0683   |
| 8  | 13 | 0.068282 |
| 1  | 4  | 0.068208 |
| 12 | 13 | 0.067619 |
| 1  | 8  | 0.067512 |
| 2  | 4  | 0.06697  |
| 4  | 14 | 0.066033 |
| 6  | 7  | 0.065976 |
| 3  | 14 | 0.064628 |
| 10 | 15 | 0.064267 |
| 12 | 14 | 0.063772 |
| 6  | 9  | 0.059398 |
| 6  | 8  | 0.055006 |
| 3  | 6  | 0.054743 |
| 6  | 10 | 0.053957 |
| 4  | 6  | 0.053257 |
| 6  | 12 | 0.0521   |
